# Supplementary material for: Unveiling the Relationship between Ceftobiprole and High-Molecular-Mass (HMM) Penicillin-Binding Proteins (PBPs) in Enterococcus faecalis
Source: Antibiotics (Basel). 2024 Jan 9;13(1):65. doi: 10.3390/antibiotics13010065 (PMC10812503; doi:10.3390/antibiotics13010065)
Supplement: Supplementary file 1 [file antibiotics-13-00065-s001.zip]

Archive with 5 entries (5 files):
- Supplementary material. Figure S1.pdf
- Supplementary material. Figure S2.pdf
- Supplementary material. Figure S3.pdf
- Supplementary material. Figure S4.pdf
- Supplementary material. Figure S5.pdf
