# Supplementary figures and images for: Unveiling the Relationship between Ceftobiprole and High-Molecular-Mass (HMM) Penicillin-Binding Proteins (PBPs) in Enterococcus faecalis
Source: MDPI journal article supplement (doi:10.3390/antibiotics13010065), 2024-01-09

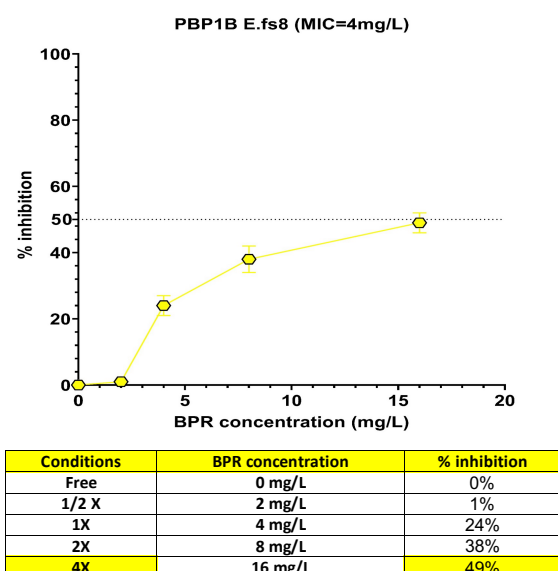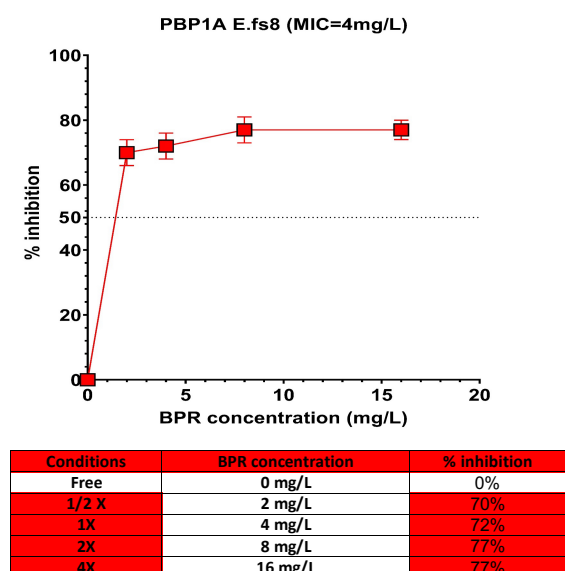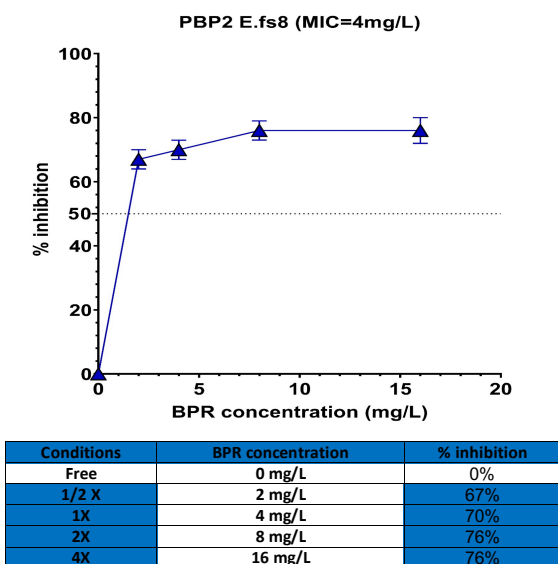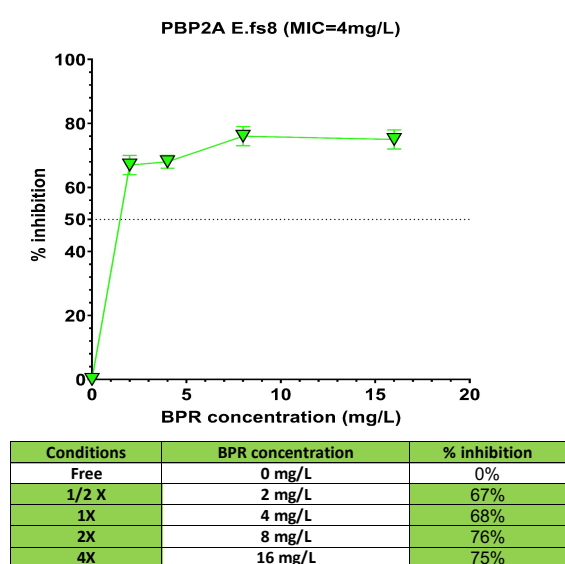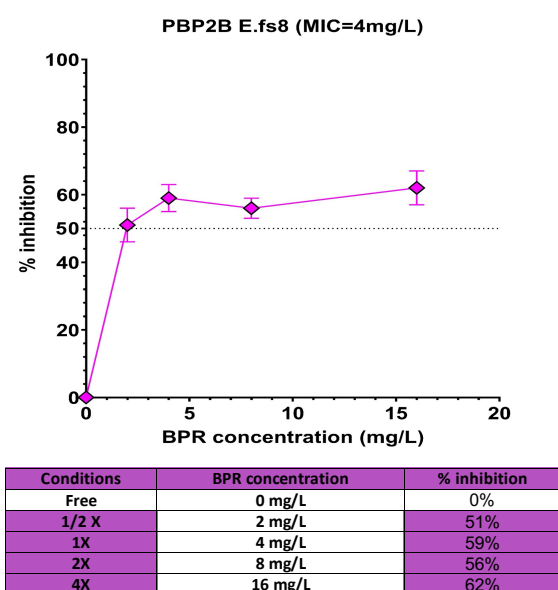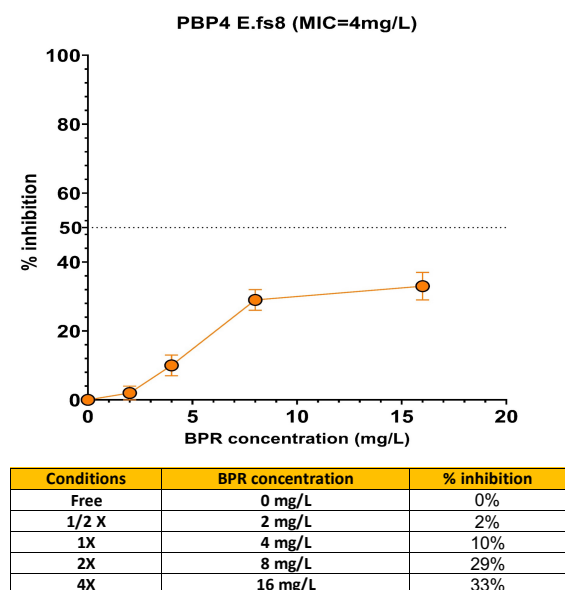

Figure S4. E.fs8 detailed PBPs inhibition rates.

Supplement: s1 [file s1]

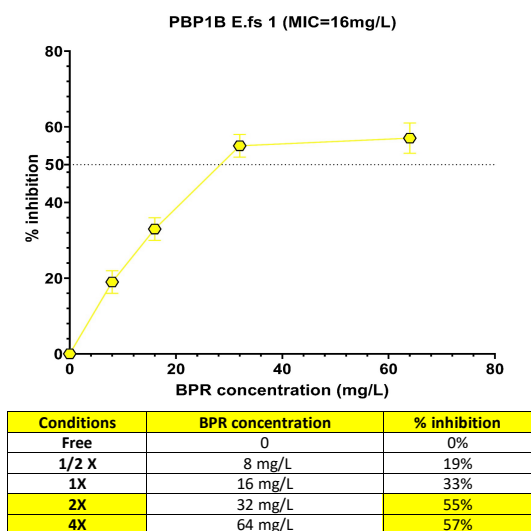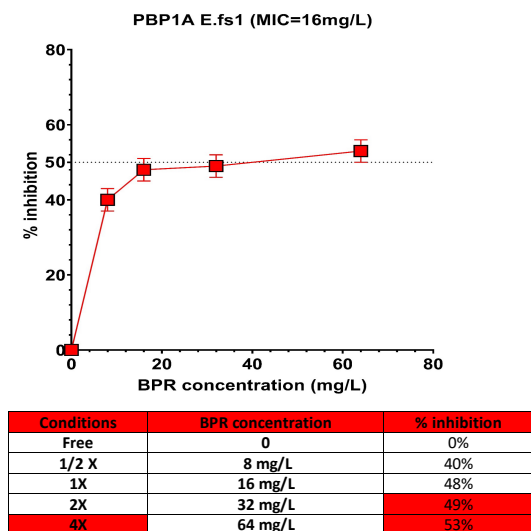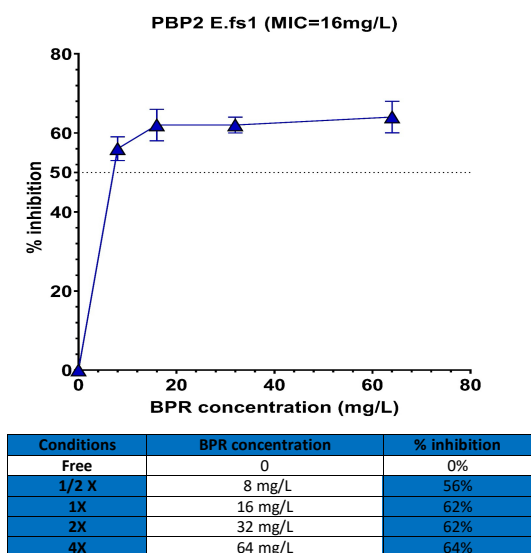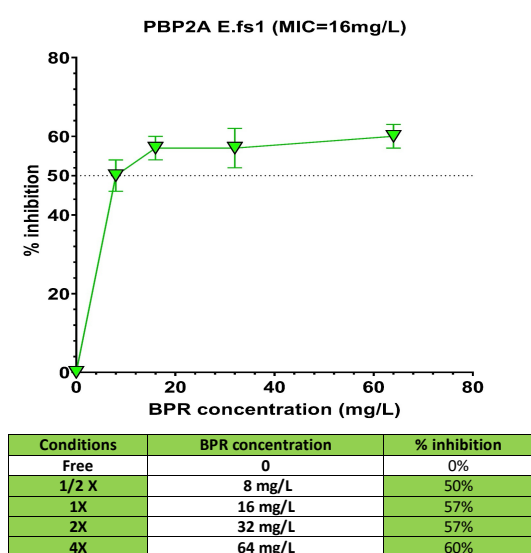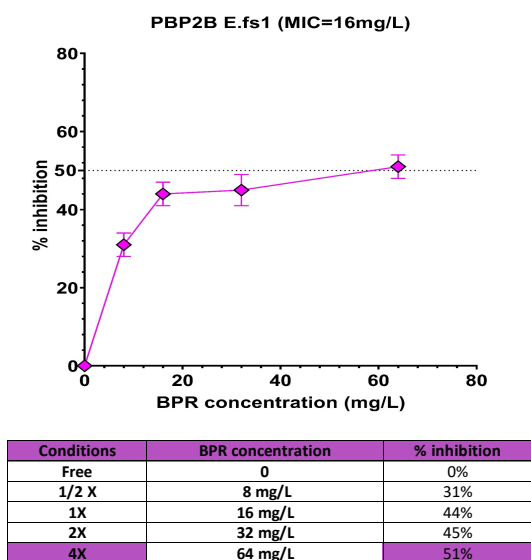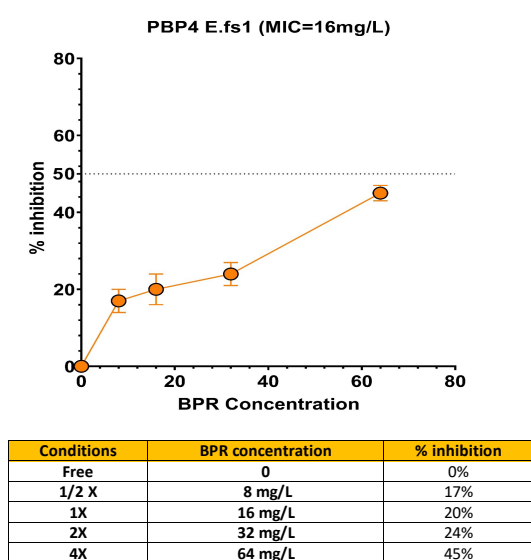

Figure S2. E.fs1 detailed PBPs inhibition rates.

Supplement: s1 [file s1]

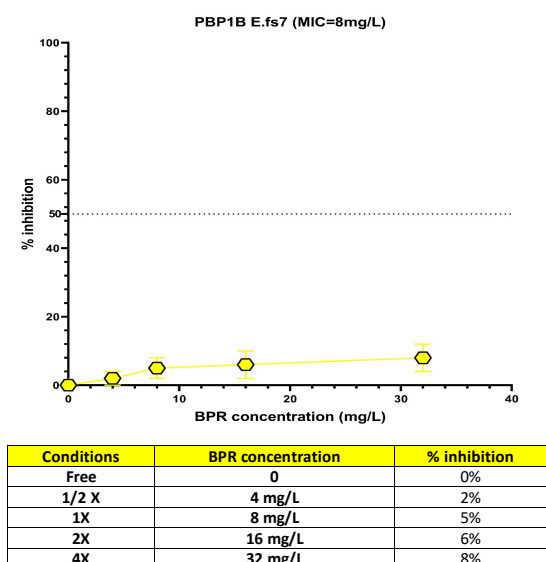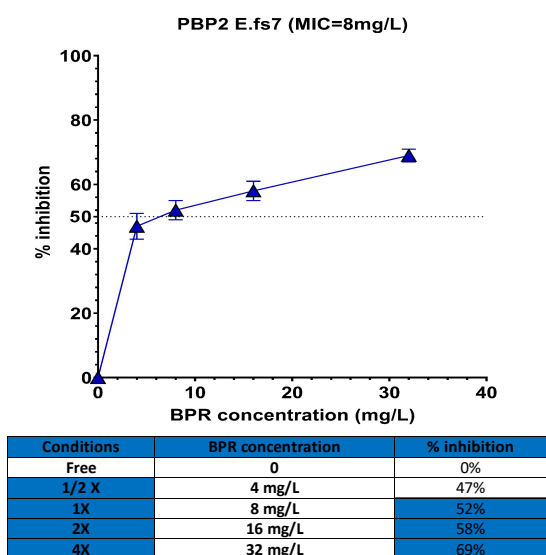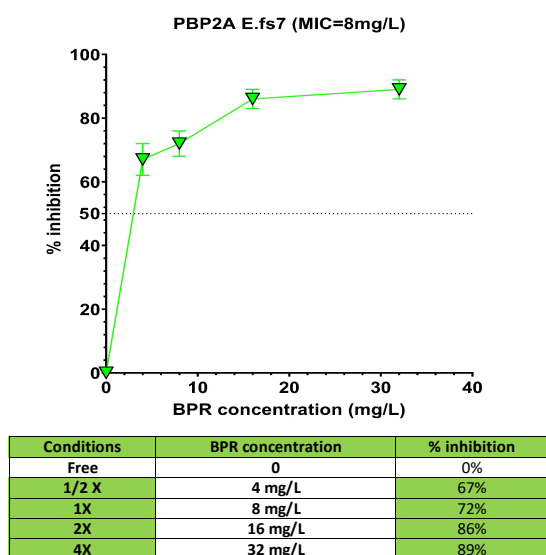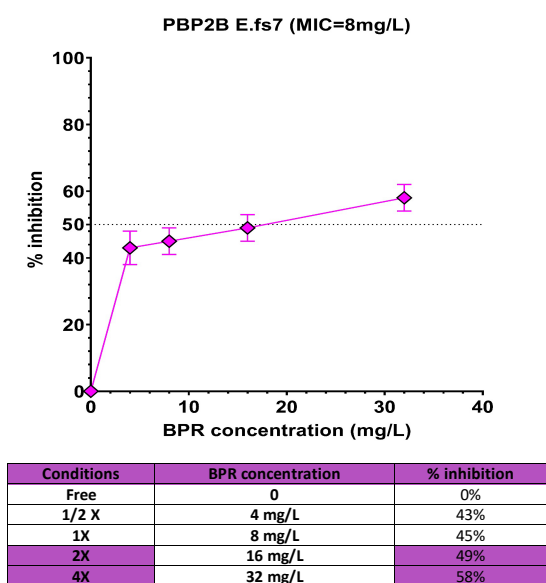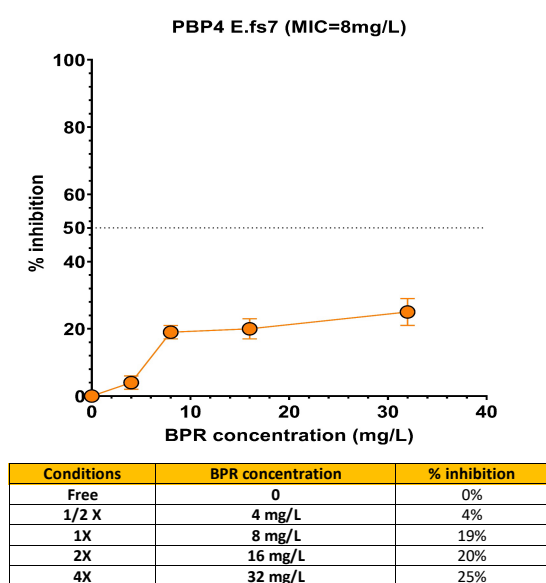

Figure S3. E.fs7 detailed PBPs inhibition rates.

Supplement: s1 [file s1]

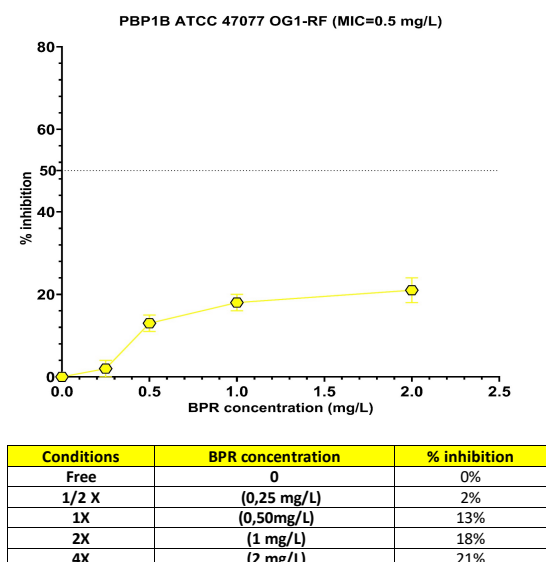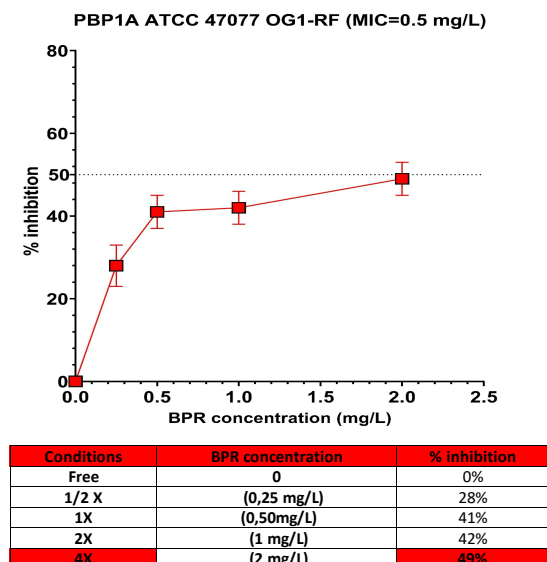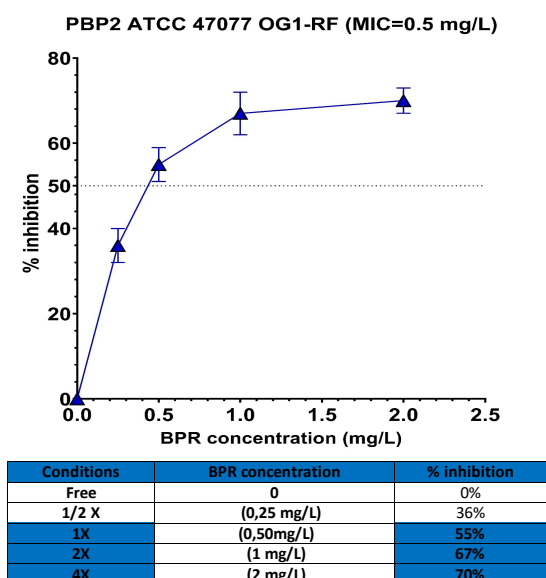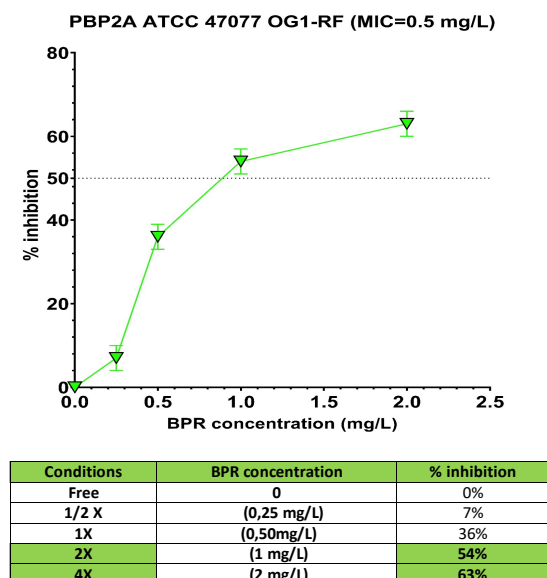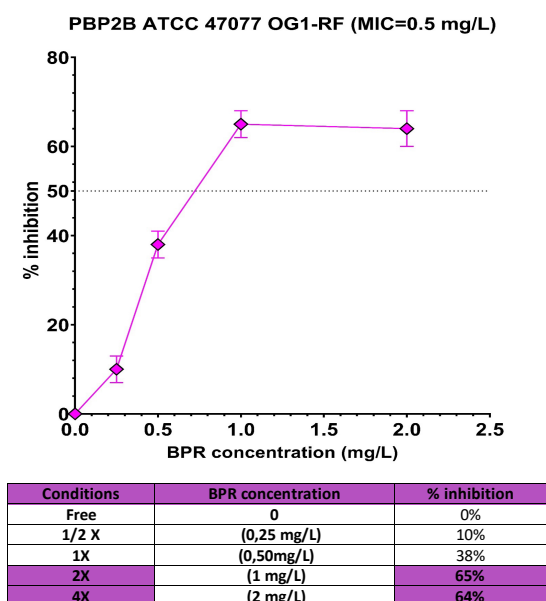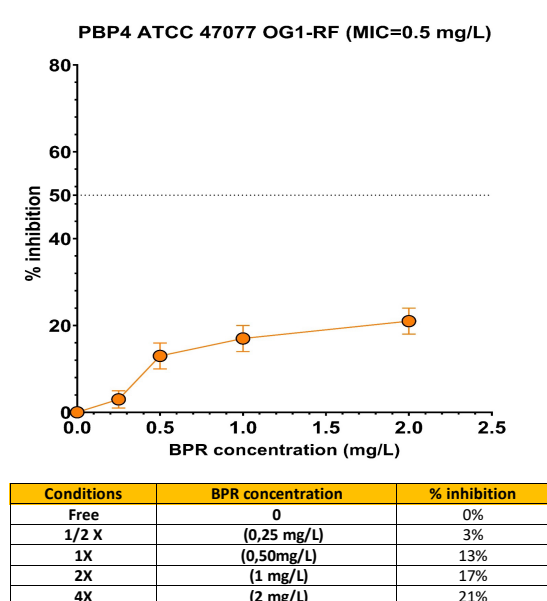

Figure S1. ATCC 47077 detailed PBPs inhibition rates.

Supplement: s1 [file s1]

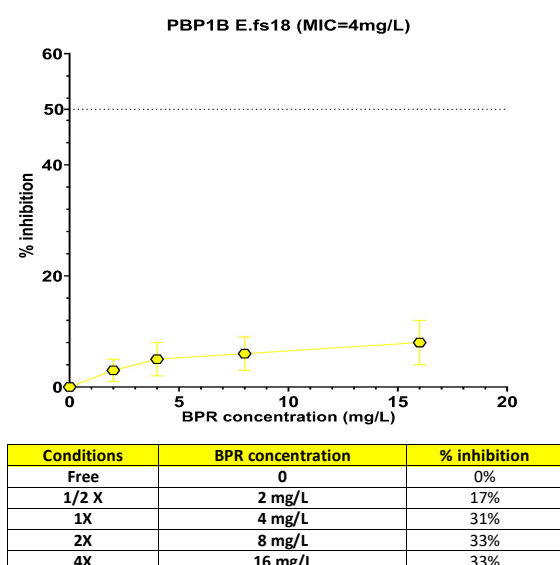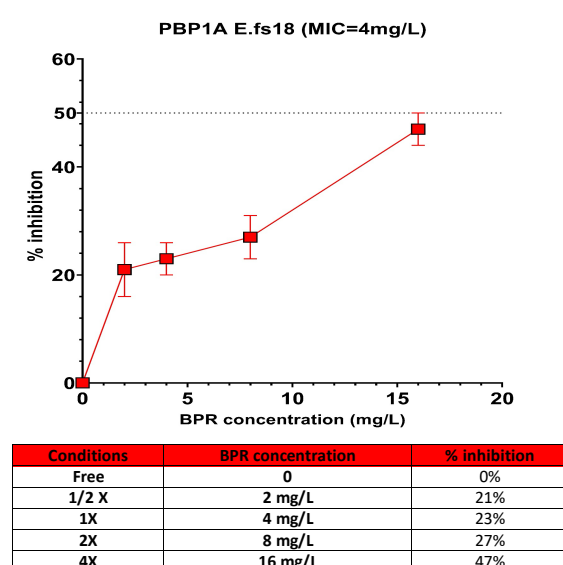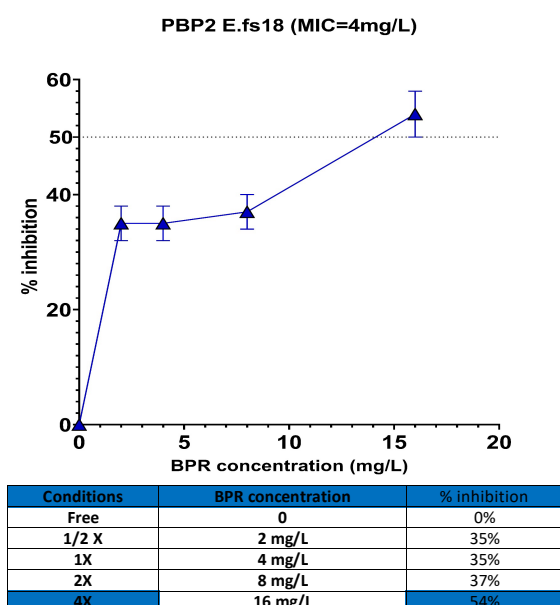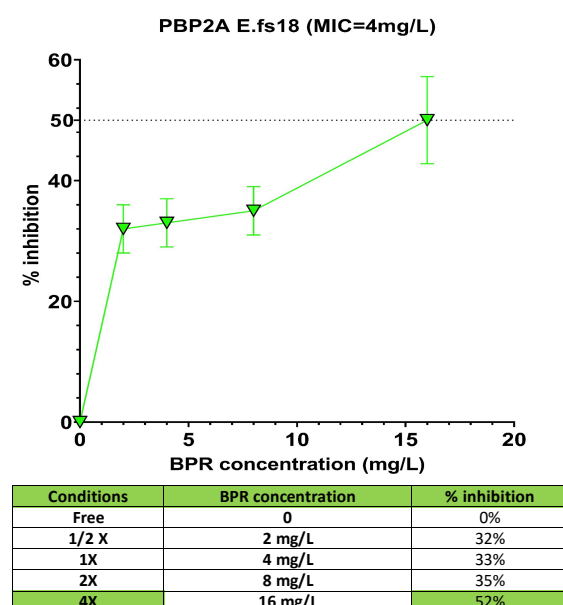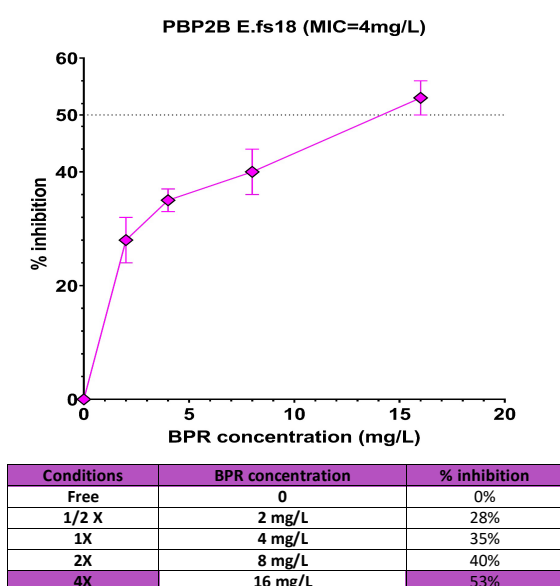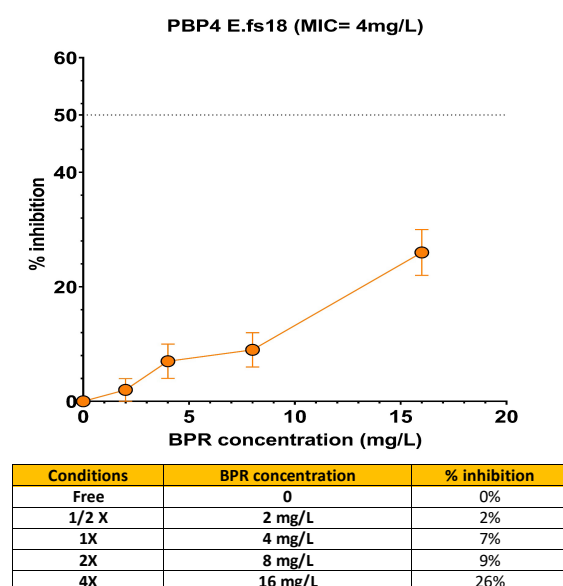

Figure S5. E.fs18 detailed PBPs inhibition rates.

Supplement: s1 [file s1]
